# Supplementary material for: Salvianolic Acid B Inhibits Aβ Generation by Modulating BACE1 Activity in SH-SY5Y-APPsw Cells
Source: PubMed Central journal article supplement (PMC4924174; doi:10.3390/nu8060333), 2016-06-01
Supplement: nutrients-08-00333-s001.pdf [file nutrients-08-00333-s001.pdf]

## Supplementary Materials: Salvianolic Acid B Inhibits A $\beta$ Generation by Modulating BACE1 Activity in SH-SY5Y-APPsw Cells

Ying Tang, Dan Huang, Mei-Hua Zhang, Wen-Sheng Zhang, Yu-Xin Tang, Zheng-Xiang Shi, Li Deng, Dai-Han Zhou and Xin-Yi Lu

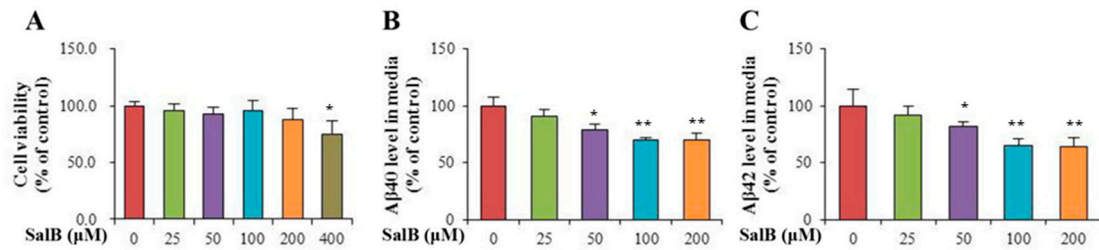

**Figure S1.** Effect of SalB on cell viability, A $\beta$ 40 and A $\beta$ 42 levels in SH-SY5Y-APPsw cells. Cell viability (A); A $\beta$ 40 (B) and A $\beta$ 42 levels (C) were measured in SH-SY5Y-APPsw cells. Values were expressed as mean  $\pm$  SD in each group ( $n = 3$ ). \*  $p < 0.05$ , \*\*  $p < 0.01$  vs. control. SalB: Salvianolic acid B.
